# Supplementary material for: The extremely warm summer of 2018 in Sweden – set in a historical context
Source: Copernicus journal article supplement (doi:10.5194/esd-11-1107-2020), 2020-12-07
Supplement: Supplementary file 1 [file esd-11-1107-2020-supplement.pdf]

Supplement of Earth Syst. Dynam., 11, 1107–1121, 2020  
<https://doi.org/10.5194/esd-11-1107-2020-supplement>  
© Author(s) 2020. This work is distributed under  
the Creative Commons Attribution 4.0 License.

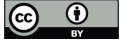

*Supplement of*

## **The extremely warm summer of 2018 in Sweden – set in a historical context**

**Renate Anna Irma Wilcke et al.**

*Correspondence to:* Renate Anna Irma Wilcke ([renate.wilcke@smhi.se](mailto:renate.wilcke@smhi.se))

The copyright of individual parts of the supplement might differ from the CC BY 4.0 License.

## Supplement

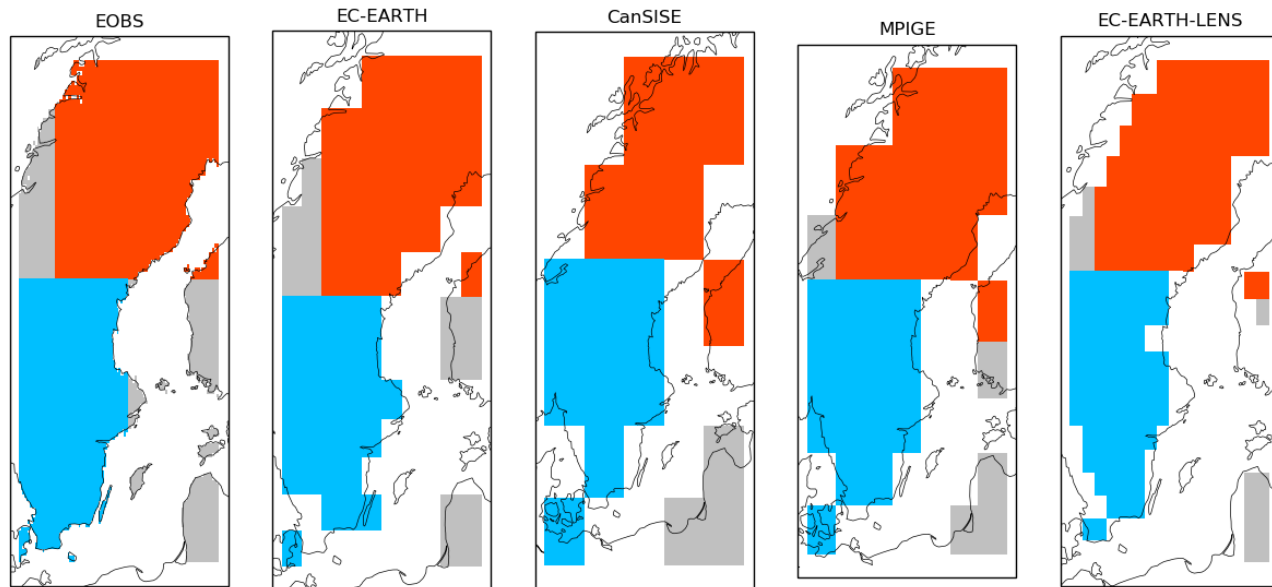

**Figure S1.** The maps show the land-sea mask of the models and illustrates how the distinction between northern (red) and southern (blue) Sweden has been made.

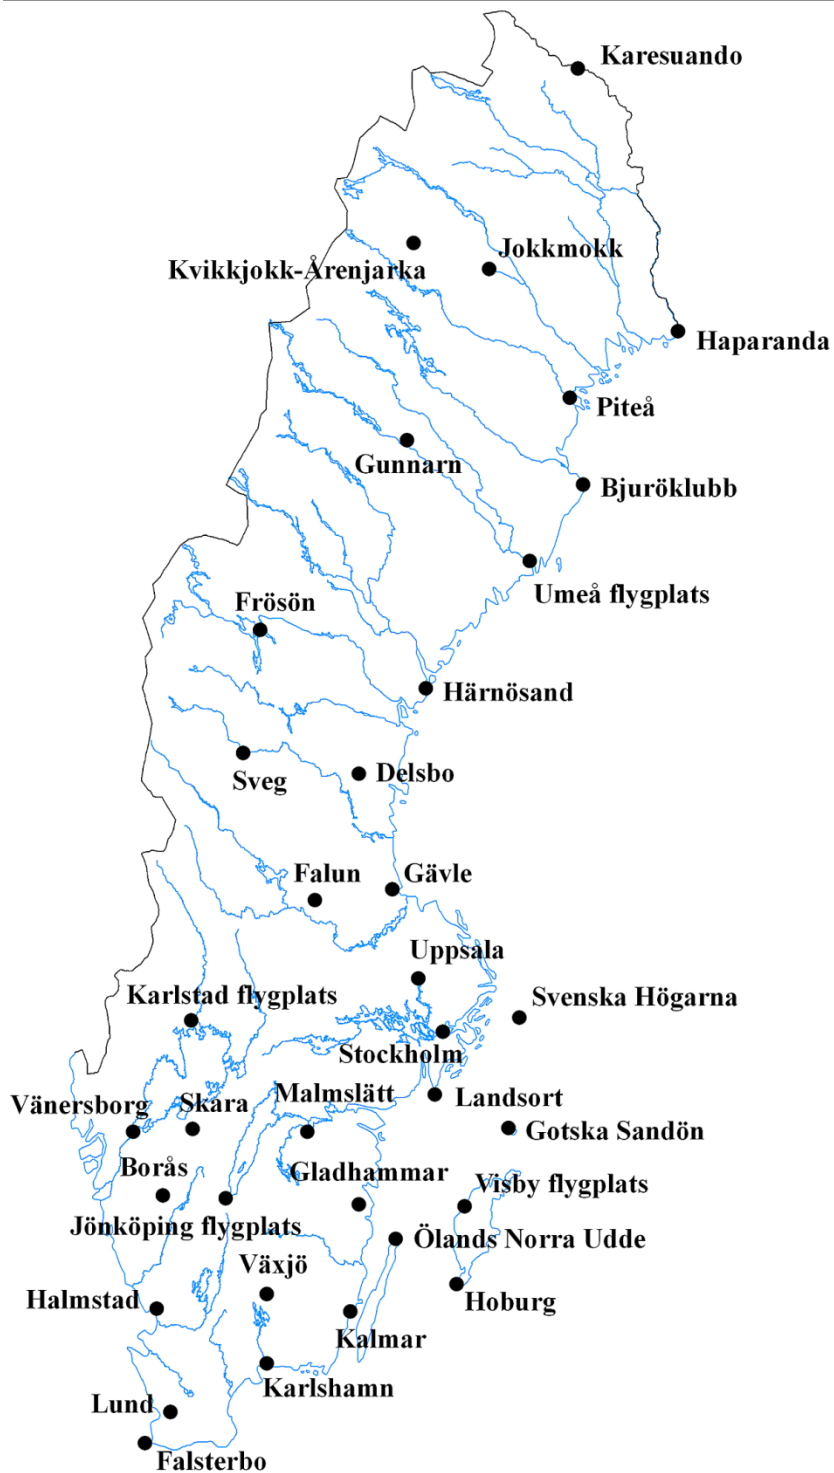

Figure S2. Observational stations operated in Sweden by SMHI used to calculate an average for the whole country.

10 **Table S1. CMIP5 members used in this study. Details on the CMIP5 ensemble can be found in Taylor et al. (2012).**

| Model name    | Version                                                                | Horizontal grid                                    | Time resolution           | Radiative forcing |
|---------------|------------------------------------------------------------------------|----------------------------------------------------|---------------------------|-------------------|
| ACCESS1-0     | r1i1p1                                                                 | 192 × 145 N96                                      | monthly                   | rcp 8.5           |
| ACCESS1-3     | r1i1p1                                                                 | 192 × 145 N96                                      | monthly & daily           | rcp 8.5           |
| bcc-csm1-1    | r1i1p1                                                                 | T42 T42L26                                         | monthly & daily           | rcp 8.5           |
| bcc-csm1-1-m  | r1i1p1                                                                 | T106                                               | monthly & daily           | rcp 8.5           |
| BNU-ESM       | r1i1p1                                                                 | T42                                                | monthly & daily           | rcp 8.5           |
| CanESM2       | r1i1p1, r2i1p1, r3i1p1, r4i1p1, r5i1p1                                 | Spectral T63                                       | monthly & daily (r1i1p1)  | rcp 8.5           |
| CCSM4         | r1i1p1, r2i1p1, r3i1p1, r4i1p1, r5i1p1, r6i1p1                         | 0.9° × 1.25°                                       | monthly                   | rcp 8.5           |
| CMCC-CESM     | r1i1p1                                                                 | 3.75° × 3.75° (T31)                                | monthly                   | rcp 8.5           |
| CMCC-CM       | r1i1p1                                                                 | 0.75° × 0.75° (T159)                               | monthly                   | rcp 8.5           |
| CMCC-CMS      | r1i1p1                                                                 | 1.875° × 1.875° (T63)                              | monthly                   | rcp 8.5           |
| CNRM-CM5      | r1i1p1, r2i1p1, r4i1p1, r6i1p1                                         | TL127                                              | monthly & daily (r1i1p1)  | rcp 8.5           |
| CSIRO-Mk3-6-0 | r1i1p1, r2i1p1, r3i1p1, r4i1p1, r5i1p1, r6i1p1, r7i1p1, r8i1p1, r9i1p1 | ~1.875° × 1.875°                                   | monthly                   | rcp 8.5           |
| EC-EARTH      | r1i1p1, r2i1p1, r8i1p1, r9i1p1, r12i1p1                                | 1.125° longitudinal spacing, Gaussian grid T159L62 | monthly & daily (r12i1p1) | rcp 8.5           |
| FGOALS-g2     | r1i1p1                                                                 | 2.8125° × 2.8125°                                  | monthly                   | rcp 8.5           |
| FIO-ESM       | r1i1p1, r2i1p1, r3i1p1                                                 | T42                                                | monthly                   | rcp 8.5           |
| GFDL-CM3      | r1i1p1                                                                 | ~200 km C48L48                                     | monthly                   | rcp 8.5           |
| GFDL-ESM2G    | r1i1p1                                                                 | 2.5° longitude, 2° latitude M45L24                 | monthly                   | rcp 8.5           |
| GFDL-ESM2M    | r1i1p1                                                                 | 2.5° longitude, 2° latitude M45L24                 | monthly & daily           | rcp 8.5           |
| GISS-E2-H-CC  | r1i1p1                                                                 | Nominally 1°                                       | monthly                   | rcp 8.5           |
| GISS-E2-H     | r1i1p1, r1i1p2, r1i1p3, r2i1p1, r2i1p3                                 | 2° latitude × 2.5° longitude F                     | monthly                   | rcp 8.5           |
| GISS-E2-R-CC  | r1i1p1                                                                 | Nominally 1°                                       | monthly                   | rcp 8.5           |
| HadGEM2-AO    | r1i1p1                                                                 | 1.875° in longitude by 1.25° in latitude N96       | monthly                   | rcp 8.5           |

|                    |                                |                                                          |                          |         |
|--------------------|--------------------------------|----------------------------------------------------------|--------------------------|---------|
| HadGEM2-CC         | r1i1p1                         | 1.875° in longitude by<br>1.25° in latitude N96          | monthly                  | rcp 8.5 |
| HadGEM2-ES         | r1i1p1, r2i1p1, r3i1p1, r4i1p1 | 1.875° in longitude by<br>1.25° in latitude N96          | monthly & daily (r1i1p1) | rcp 8.5 |
| IMM-CM4            | r1i1p1                         | 2 × 1.5° in longitude<br>and latitude latitudelongitude  | monthly                  | rcp 8.5 |
| IPSL-CM5A-LR       | r1i1p1, r2i1p1, r3i1p1, r4i1p1 | 96 × 95 equivalent<br>to 1.9° × 3.75° LMDZ96<br>× 95     | monthly                  | rcp 8.5 |
| IPSL-CM5A-MR       | r1i1p1                         | 144 × 143 equivalent<br>to 1,25° × 2.5° LMDZ144<br>× 143 | monthly & daily          | rcp 8.5 |
| IPSL-CM5B-LR       | r1i1p1                         | 96 × 95 equivalent<br>to 1.9° × 3.75° LMDZ96<br>× 95     | monthly & daily          | rcp 8.5 |
| MIROC5             | r1i1p1, r2i1p1, r3i1p1         | 1.40625 × 1.40625°<br>T85                                | monthly & daily (r1i1p1) | rcp 8.5 |
| MIROC-ESM-<br>CHEM | r1i1p1                         | 2.8125 × 2.8125° T42                                     | monthly & daily (r1i1p1) | rcp 8.5 |
| MIROC-ESM          | r1i1p1                         | 2.8125 × 2.8125° T42                                     | monthly                  | rcp 8.5 |
| MPI-ESM-LR         | r1i1p1, r2i1p1, r3i1p1         | approx. 1.8° T63                                         | monthly & daily (r1i1p1) | rcp 8.5 |
| MPI-ESM-MR         | r1i1p1                         | approx. 1.8° T63                                         | monthly                  | rcp 8.5 |
| MRI-CGCM3          | r1i1p1                         | 320 × 160 TL159                                          | monthly                  | rcp 8.5 |
| MRI-ESM1           | r1i1p1                         | TL159(320 × 160)                                         | monthly                  | rcp 8.5 |
| NorESM1-ME         | r1i1p1                         | Finite Volume 1.9°<br>latitude, 2.5° longitude           | monthly                  | rcp 8.5 |
| NorESM1-M          | r1i1p1                         | Finite Volume 1.9°<br>latitude, 2.5° longitude           | monthly & daily (r1i1p1) | rcp 8.5 |

---
